# Supplementary material for: Virus Identification in Unknown Tropical Febrile Illness Cases Using Deep Sequencing
Source: PubMed Central journal article supplement (PMC3274504; doi:10.1371/journal.pntd.0001485), 2012-02-07

Yozwiak *et al* Figure S1

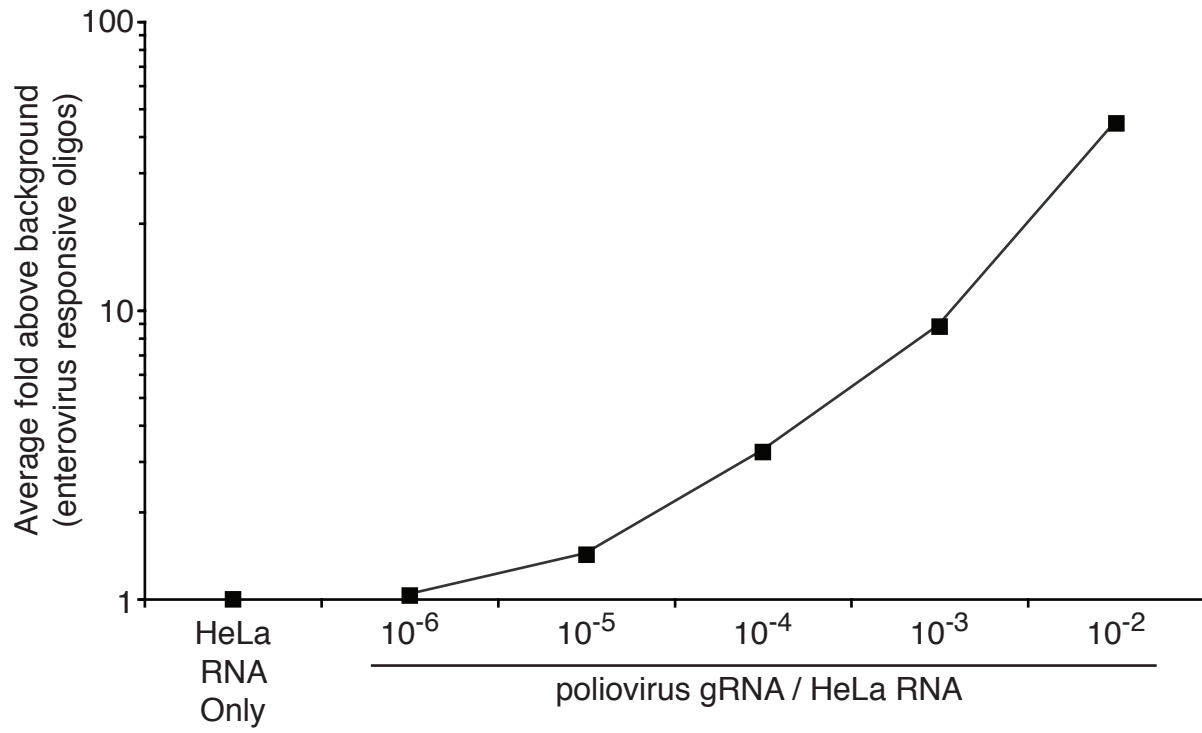

Supplement: pntd.0001485.s001.pdf [file pntd.0001485.s001.pdf]
