# Supplementary material for: Virus Identification in Unknown Tropical Febrile Illness Cases Using Deep Sequencing
Source: PubMed Central journal article supplement (PMC3274504; doi:10.1371/journal.pntd.0001485), 2012-02-07
Supplement: pntd.0001485.s002.pdf [file pntd.0001485.s002.pdf]

**Table S1 - Oligonucleotides used in this study**Yozwiak *et al*

| Primer Name      | Description                                      | Sequence (5'-3')                                                        |
|------------------|--------------------------------------------------|-------------------------------------------------------------------------|
| SolCommonBar+hex | Reverse transcription (pools 1-4)                | CGCTCTTCCGATCTN<barcode>NNNNNN (a)                                      |
| SolCommonBar     | Library amplification (pools 1-4)                | CGCTCTTCCGATCTN<barcode> (a)                                            |
| SolCommon+hex    | Reverse transcription (pool 5)                   | CGCTCTTCCGATCTNNNNNN                                                    |
| SolCommon        | Library amplification (pool 5)                   | CGCTCTTCCGATCT                                                          |
| pr2              | Illumina adapter A, short                        | CTACACGACGCTCTTCCGATCT                                                  |
| pr3              | Illumina adapter A, full length                  | AATGATACGGCGACCACCGAGATCTACACTCTTCCCTACACGACGCTCTTCCGATCT               |
| pr4              | Illumina adapter B (pools 1-4)                   | CAAGCAGAAGACGGCATACGAGATCGGTCTCGGCATTCCTGCTGAACCGCTCTTCCGATCT           |
| pr4-bar          | Barcoded illumina adapter (pool 5)               | CAAGCAGAAGACGGCATACGAGAT<barcode>GTGACTGGAGTTCAGACGTGTGCTCTTCCGATCT (b) |
| MAMD             | DENV sequence recovery (c)                       | AACATGATGGGARAARAGRARAA                                                 |
| cFD2             | DENV sequence recovery (c)                       | GTGTCCCAGCCGGCGGTGTCATCAGC                                              |
| MDS-47           | HAV sequence recovery                            | CTAAATTGGGGACRCAGATG                                                    |
| MDS-48           | HAV sequence recovery                            | TGAGGAAAAACCTAAATGCC                                                    |
| CvI-NI-1 1F      | Circovirus-like rep sequence recovery (CvL-NI-1) | GGGTGAGATTGGTGCTGGTA                                                    |
| CvI-NI-1 4R      | Circovirus-like rep sequence recovery (CvL-NI-1) | CCTTTTTGCTCCACAAGGACT                                                   |
| MDS-227          | Circovirus-like rep sequence recovery (CvL-NI-1) | TGAATTTACTGGTCAGGTGGAG                                                  |
| MDS-230          | Circovirus-like rep sequence recovery (CvL-NI-1) | GCTTCCTGGTTCAAATCTTGG                                                   |
| MDS-267          | Circovirus-like rep sequence recovery (CvL-NI-2) | CGAAGCTTAGGCGTCTAAATG                                                   |
| MDS-270          | Circovirus-like rep sequence recovery (CvL-NI-2) | GCATCTGGGGTCATTTCTTC                                                    |
| MDS-219          | Circovirus-like rep sequence recovery (CvL-NI-3) | GCTGCTAAAGGAACGACTGAAC                                                  |
| MDS-221          | Circovirus-like rep sequence recovery (CvL-NI-3) | GTTTCCAGTCGGGCCATAG                                                     |

(a) Pool 1-4 barcodes:

AAA, ACC, AGG, ATT, CAC, CCA, CGT, CTG, GAG, GCT, GGA, GTC, TAT, TCG, TGC, TTA, AAAA, AACC, AAGG, AATT, ATAT, ATTA

(b) Pool 5 barcodes:

GGTCTAA, ACAGAAG, TTGACCT, CACTGGA, AAGATCC, CCTTCAA, TGAGGTA, GTCCAAC, AACACCT, CCACTAA, GGTCTT, TTGGTTG, TCCGGTT, GTACTAG, CATTGAC, AGGAATC, AATTCCG, TCAATCC, TAACCAC, TCAGACT, CTAGCGA, TTGTCAC, GGCATA, TTACACC, GGATTCC, CCGAAT, TCTTGTC, CGCTATG, ATCGACC, GTCATTG, GGTAATG, TGGCAAG, TGAAGAC, TAAGTGC, AACTTGC, AATCGTC, TAAGGAG, ATAGGAC, ACTACTG, CGTTACC, GGTCAC, GGACAAT, TTAGAGG, ATGCACT, TATCAGG, GCAACAT, GTTGGTC, TACCGAA, GTTGAAG, GTGAACC, AAGTGGT, TCTAGGT, GCATGAA, CAACGTA, TTCTTCC, AACAGTG, TTACGTG, CCAAGTC, CTGAGTG, TAGCCTA, GATGCCA, TACAAGC, TAGGCGT, GAACCTT, TTCAACG, TGGTAGT, GAAGAGT, CAGTTCA, CAGGCAA, GATATGG, ACTCAGA, CACTCTT, GCCTTAT, CAAGCCT, TAGACAG, CAATACG, TACCTTC, AAGGCTC, TGAGCAT, TATTCCG, TCCATAG, CTAATGG, TGGCTCA, CTTTCATG, AGACCGT, GAGTTAC, AGTGCTA, AACCTAG, AAGCAAC, AGATGTG, CGTTGTA, ACTGGCT, ATCTGCA, ATTCCAC, GACCATA, AGAACCA

(c) Primers from: Scaramozzino *et al.* J Clin Microbiol (2001) vol. 39 (5) pp. 1922-7
