# Supplementary material for: Virus Identification in Unknown Tropical Febrile Illness Cases Using Deep Sequencing
Source: PubMed Central journal article supplement (PMC3274504; doi:10.1371/journal.pntd.0001485), 2012-02-07
Supplement: pntd.0001485.s003.pdf [file pntd.0001485.s003.pdf]

**Table S2, Protein Sequences used to construct phylogenetic tree in Figure 3.***Yozwiak et al*

| Abbreviation    | NCBI GI   | Protein                                      | Organism                                      |
|-----------------|-----------|----------------------------------------------|-----------------------------------------------|
| BaCV            | 330339439 | putative replication protein                 | Barbel circovirus                             |
| BatCV_1         | 342356276 | replication-associated protein               | Bat circovirus ZS/Yunnan-China/2009           |
| BatCV_2         | 342356282 | replication-associated protein               | Bat circovirus ZS/Yunnan-China/2009           |
| BatCV_3         | 342356307 | replication-associated protein               | Bat circovirus ZS/Yunnan-China/2009           |
| BFDV            | 11119205  | putative replicase-associated protein        | beak and feather disease virus                |
| CaCV            | 18875310  | replicase                                    | Canary circovirus                             |
| Circo-like_CB-A | 254688534 | putative Rep protein                         | Circovirus-like genome CB-A                   |
| Circo-like_RW-E | 254688531 | putative Rep protein                         | Circovirus-like genome RW-E                   |
| Cyclo_Dragonfly | 324309787 | replication associated protein               | Dragonfly cyclovirus                          |
| Cyclo_PKbeef    | 316989866 | Rep protein                                  | Cyclovirus PKbeef23/PAK/2009                  |
| Cyclo_TN18      | 290783653 | replication-association protein              | Cyclovirus TN18                               |
| DuCV            | 269979225 | rep                                          | Muscovy duck circovirus                       |
| Ed              | 167387593 | replication-associated protein               | Entamoeba dispar SAW760                       |
| Gi              | 6840822   | putative replication-associated protein REP2 | Giardia intestinalis                          |
| PCV2            | 222160098 | ORF1                                         | Porcine circovirus 2                          |
| RodCV_1         | 343196930 | REP                                          | Rodent stool-associated circular genome virus |
| RodCV_2         | 343196943 | REP                                          | Rodent stool-associated circular genome virus |
| RodCV_3         | 343196958 | REP 2                                        | Rodent stool-associated circular genome virus |
| UncCV           | 333596611 | Rep                                          | uncultured circovirus                         |

CvI-NI-2 sequence, which is below the limit of 200 nucleotides for GenBank submission:

```
>Circo-like_NI_2007_Rep_2 [organism=Circovirus-like_NI/2007-2] Circovirus-like NI/2007-2 Rep protein gene, partial cds
CCGTCCACGAAGCTTAGGCGTCTTAAATGATCTCGAGAATGAATGGTGGTATGGAGATACCGGTACAGGCAAATCTAAAAAAGCTTGGGAAGCTATAT
CCAAATCATTACGGCAAAGCACTTAATAAATGGTGGGATGGTTATAATGATGAAGATATTGTAGTCATTGAAGAAATGACCCAGATGCTGGAT
```
